# Patterns of Multimorbidity in the Aged Population. Results from the KORA-Age Study

Inge Kirchberger<sup>1,2\*</sup>, Christa Meisinger<sup>1,2</sup>, Margit Heier<sup>1,2</sup>, Anja-Kerstin Zimmermann<sup>1</sup>, Barbara Thorand<sup>1</sup>, Christine S. Autenrieth<sup>1</sup>, Annette Peters<sup>1</sup>, Karl-Heinz Ladwig<sup>1</sup>, Angela Döring<sup>1,3</sup>

**1** Institute of Epidemiology II, Helmholtz Zentrum München, German Research Center for Environmental Health, Neuherberg, Germany, **2** MONICA/KORA Myocardial Infarction Registry, Central Hospital of Augsburg, Augsburg, Germany, **3** Institute of Epidemiology I, Helmholtz Zentrum München, German Research Center for Environmental Health, Neuherberg, Germany

## Abstract

Multimorbidity is a common problem in aged populations with a wide range of individual and societal consequences. The objective of the study was to explore patterns of comorbidity and multimorbidity in an elderly population using different analytical approaches. Data were gathered from the population-based KORA-Age project, which included 4,127 persons aged 65–94 years living in the city of Augsburg and its two surrounding counties in Southern Germany. Information on the presence of 13 chronic conditions was collected in a standardized telephone interview and a self-administered questionnaire. Patterns of comorbidity and multimorbidity were analyzed using prevalence figures, logistic regression models and exploratory tetrachoric factor analysis. The prevalence of multimorbidity ( $\geq 2$  diseases) was 58.6% in the total sample. Hypertension and diabetes (Odds Ratio [OR] 2.95, 99.58% confidence interval [CI] [2.19–3.96]), as well as hypertension and stroke (OR 2.00, 99.58% CI [1.26–3.16]) most often occurred in combination. This association was independent of age, sex and the presence of other conditions. Using factor analysis, we identified four patterns of multimorbidity: the first pattern includes cardiovascular and metabolic diseases, the second includes joint, liver, lung and eye diseases, the third covers mental and neurologic diseases and the fourth pattern includes gastrointestinal diseases and cancer. 44% of the persons were assigned to at least one of the four multimorbidity patterns; 14% could be assigned to both the cardiovascular/metabolic and the joint/liver/lung/eye pattern. Further common pairs were the mental/neurologic pattern combined with the cardiovascular/metabolic pattern (7.2%) or the joint/liver/lung/eye pattern (5.3%), respectively. Our results confirmed the existence of co-occurrence of certain diseases in elderly persons, which is not caused by chance. Some of the identified patterns of multimorbidity and their overlap may indicate common underlying pathological mechanisms.

**Citation:** Kirchberger I, Meisinger C, Heier M, Zimmermann A-K, Thorand B, et al. (2012) Patterns of Multimorbidity in the Aged Population. Results from the KORA-Age Study. PLoS ONE 7(1): e30556. doi:10.1371/journal.pone.0030556

**Editor:** Ulrich Thiem, Marienhospital Herne - University of Bochum, Germany

**Received:** September 6, 2011; **Accepted:** December 19, 2011; **Published:** January 23, 2012

**Copyright:** © 2012 Kirchberger et al. This is an open-access article distributed under the terms of the Creative Commons Attribution License, which permits unrestricted use, distribution, and reproduction in any medium, provided the original author and source are credited.

**Funding:** The KORA research platform (KORA, Cooperative Research in the Region of Augsburg) was initiated and financed by the Helmholtz Zentrum München - German Research Center for Environmental Health, which is funded by the German Federal Ministry of Education and Research and by the State of Bavaria. The KORA-Age project was financed by the German Federal Ministry of Education and Research (BMBF FKZ 01ET0713) as part of the “Health in old age” program. The funders had no role in study design, data collection and analysis, decision to publish, or preparation of the manuscript.

**Competing Interests:** The authors have declared that no competing interests exist.

\* E-mail: Inge.Kirchberger@helmholtz-muenchen.de

## Introduction

Multimorbidity is commonly defined as coexistence of two or more chronic diseases in the same individual [1]. It is associated with reduced health outcomes including functioning and quality of life [2,3], more complex clinical management [4], specific health care needs [5,6] and increased health care costs [7].

Since chronic diseases are associated with advanced age and the number of aged persons in the population is rising, multimorbidity increasingly becomes an important issue in health care. Studies indicate that older people are more prone to develop two or more chronic conditions than younger ones [8,9]. Thus, many studies have been limited in focus to older persons when studying multimorbidity. Reported prevalence rates of multimorbidity in aged populations vary considerably depending on data sources, considered diagnoses and study populations [10]. In Germany, the prevalence of multimorbidity ranged from 67.3% in the 50–75 year old population studied by Nagel et al. [11] to 73% in the

study of Van den Bussche et al. [12] who analyzed claims data of 123,224 insured policy holders aged 65 and older. A recent systematic review of 41 published studies worldwide reported a range of multimorbidity between 55 and 98% of persons aged 65 and older [13].

Diseases that are common in older people may occur together by chance. However, often “common pathways” may lead to clustering of major chronic conditions. The impact of co-occurrence on functional status is sometimes greater than the sum of the impacts of the individual diseases [14]. Thus, analysis and exploration of “common pathways” of these co-occurring conditions offers the potential for improved medical management and for targeted interventions.

However, only few studies have explored the natural clustering of chronic conditions in aged populations so far. Some studies identified the most common comorbid pairs [14–16] or analyzed triadic combinations of diseases [12]. Only a few studies used cluster analysis in order to obtain a general picture of the broad

pattern of how diseases are associated in a particular population [16–18]. Schäfer et al. [19] were the first who applied factor analysis as a method to explore multimorbidity patterns and identified three patterns: cardiovascular/metabolic disorders, anxiety/depression/somatoform disorders and pain, and neuro-psychiatric disorders.

The objective of the present study was to explore patterns of comorbidity and multimorbidity in a Southern German population aged 65–94 years.

## Methods

### Ethics statement

The KORA-Age study was approved by the Ethics Committee of the Bavarian Medical Association. Written informed consent has been obtained from the participants and all investigations have been conducted according to the principles expressed in the Declaration of Helsinki.

### Study population

Data from the present study derived from the “KORA-Age” study which is a follow-up of all individuals aged 65–94 who have participated in at least one of the four cross-sectional MONICA/KORA surveys. These surveys have been conducted between 1984 and 2001 and included a random sample of the population of the city of Augsburg and its two surrounding counties in Southern Germany [20]. Details about study design, sampling method and data collection are reported elsewhere [21]. In total, 17,607 persons participated in at least one of the four surveys. The KORA-Age study population is restricted to the subgroup of 9,197 subjects who were born in 1943 or earlier. 2,734 of these 9,197 individuals died, 45 moved abroad or to an unknown location, and

427 refused to be contacted for any follow-up. A brief self-administered questionnaire was mailed to the entire KORA sample including the remaining 5,991 eligible persons of the KORA-Age subgroup with known address between November 2008 and September 2009. All persons who did not answer within 4 weeks were sent a postcard reminder. Four weeks later, non-responders were contacted by telephone and if the persons agreed to participate, the questionnaire was administered via telephone. In total, questionnaire data could be collected for 4,565 persons (response 76.2%), of whom 3,833 returned the questionnaire by mail and 732 (16.0%) were interviewed via telephone.

In addition to the data collected by questionnaire, in order to collect more specific data relevant for elderly people, an extended telephone interview was conducted with the 5,986 eligible persons with known address between December 2008 and November 2009. Of these, 1,859 persons could not be contacted or refused to participate. For 4,127 eligible persons, a telephone interview could be performed either with the persons themselves ( $n = 3,942$ ) or with a proxy (i.e. a family member or care giver) ( $n = 185$ ).

### Data collection

The presence of chronic health conditions was self-reported by the participants in the self-administered questionnaire and the standardized telephone interview. In the questionnaire the participants were asked whether they were ever diagnosed with a myocardial infarction, hypertension, stroke, diabetes mellitus or a malignant disease. In addition, participants should indicate whether they had a coronary artery bypass graft surgery or received a coronary artery stent.

The telephone interview was based on the self-report-generated Charlson Comorbidity Index [22] (see Table 1). The participants were requested to indicate whether they currently have asthma,

**Table 1.** Assessment of diseases in the KORA-Age Study.

| Self-report generated Charlson Comorbidity Index                                     | KORA-Age Study                                                                                               |                                                                                 |
|--------------------------------------------------------------------------------------|--------------------------------------------------------------------------------------------------------------|---------------------------------------------------------------------------------|
| Disease                                                                              | Disease                                                                                                      | Source                                                                          |
| Asthma, emphysema, or chronic bronchitis                                             | ✓                                                                                                            | Telephone interview                                                             |
| Arthritis or rheumatism                                                              | ✓                                                                                                            | Telephone interview                                                             |
| Cancer, diagnosed in the past 3 years                                                | ✓                                                                                                            | Questionnaire                                                                   |
| Diabetes                                                                             | ✓                                                                                                            | Questionnaire                                                                   |
| Digestive problems (such as ulcer, colitis, or gallbladder disease)                  | ✓                                                                                                            | Telephone interview                                                             |
| Heart trouble (such as angina, congestive heart failure, or coronary artery disease) | ✓                                                                                                            | Questionnaire, telephone interview                                              |
| Kidney disease                                                                       | ✓                                                                                                            | Telephone interview                                                             |
| Liver problems (such as cirrhosis)                                                   | ✓                                                                                                            | Telephone interview                                                             |
| Stroke                                                                               | ✓                                                                                                            | Questionnaire                                                                   |
| HIV illness or AIDS                                                                  | -                                                                                                            | Not requested*                                                                  |
|                                                                                      | Neurologic diseases such as multiple sclerosis, Parkinson's disease, or epilepsy                             | Telephone interview                                                             |
|                                                                                      | Eye diseases such as glaucoma, cataract, macular degeneration, diabetic retinopathy, or retinitis pigmentosa | Telephone interview                                                             |
|                                                                                      | Hypertension                                                                                                 | Questionnaire                                                                   |
|                                                                                      | Depression                                                                                                   | Geriatric Depression scale (GDS-15) administered via telephone interview        |
|                                                                                      | Anxiety                                                                                                      | Generalized Anxiety Disorder Scale-7 (GAD) administered via telephone interview |

\*none of the participants reported antiretroviral therapy in the medication history.  
doi:10.1371/journal.pone.0030556.t001

emphysema or chronic obstructive pulmonary disease, an inflammatory joint disease (e.g. arthritis) or a rheumatic disease, a gastrointestinal disease (e.g. gastric or duodenal ulcer, colitis, cholecystitis), heart complaints (e.g. angina pectoris, heart failure, coronary heart disease), a kidney disease, or a liver disease (e.g. cirrhosis). In addition to the disorders covered by the Charlson Comorbidity Index, we asked for the presence of neurologic diseases such as multiple sclerosis, Parkinson's disease, or epilepsy, whether the participant has or had a glaucoma or cataract, and finally we requested the presence of any other disease which has not been mentioned before. Depression was assessed using the Geriatric Depression Scale (GDS-15) [23]. Scores above 10 points were considered framing depression. The presence of an anxiety disorder was assessed using the Generalized Anxiety Disorder Scale-7 (GAD) [24]. Scores  $\geq 10$  points indicated the presence of an anxiety disorder. An eye disease was deemed to be present if participants indicated to have glaucoma or cataract or other eye diseases such as macular degeneration, diabetic retinopathy, and retinitis pigmentosa. Each single response to the open question on other diseases was checked. If they contained information regarding the above mentioned conditions, the presence of the condition was modified accordingly. According to the available information on diseases, 13 conditions were defined (Table 2). Multimorbidity was defined as the co-occurrence of two or more of these conditions within one person.

### Data analysis

Age-standardized prevalences were calculated for each disease and the presence of multimorbidity using the age distribution of the German population on December 31, 2007. Occurrence of multimorbidity was estimated by logistic regression modelling adjusting for age and sex. The frequency of disease pairs was computed. For the disease pairs with a frequency  $>5\%$ , the expected prevalence (prevalence disease A)  $\times$  (prevalence disease B) was computed and compared with the observed prevalence. In order to determine the strength of the association between each pair of co-occurring diseases and to control for possible confounders, logistic regression with adjustment for age, sex, and all other diseases was performed. The level of significance was set to  $p < 0.0042$  applying Bonferroni correction for multiple testing.

**Table 2.** Prevalences of the 13 chronic conditions.

| Condition                | Prevalence [%] | 95% confidence interval |
|--------------------------|----------------|-------------------------|
| Hypertension             | 57.9           | [56.3–59.4]             |
| Eye disease              | 38.1           | [36.6–39.6]             |
| Heart disease            | 25.8           | [24.4–27.1]             |
| Diabetes mellitus        | 16.8           | [15.6–17.9]             |
| Joint disease            | 16.2           | [15.1–17.4]             |
| Lung disease             | 10.3           | [9.4–11.2]              |
| Gastrointestinal disease | 8.7            | [7.8–9.6]               |
| Mental disease           | 8.4            | [7.5–9.3]               |
| Stroke                   | 7.0            | [6.2–7.8]               |
| Cancer                   | 4.3            | [3.6–4.9]               |
| Kidney disease           | 4.0            | [3.4–4.6]               |
| Neurological disease     | 3.4            | [2.9–4.0]               |
| Liver disease            | 2.4            | [1.9–2.9]               |

doi:10.1371/journal.pone.0030556.t002

Patterns of multimorbidity were analyzed by exploratory factor analysis. We applied the principal factor method and used a tetrachoric correlation matrix, which takes into account the dichotomy of the data [25]. The Kaiser-Meyer-Olkin measure was calculated to estimate the sampling adequacy for performing a factor analysis, and cumulative percent described the proportion of variance of the morbidity data that can be explained by the patterns. Factors with an eigenvalue of at least 1.0 were considered as substantial. We assumed that there will be associations among the factors, thus we used an oblique (oblimin) rotation of factor loading matrices.

We examined the frequencies of multimorbidity patterns by assigning individuals to a pattern if they experienced at least two diseases with a factor loading of  $\geq 0.25$  on the corresponding pattern. Age and sex-related differences in the pattern prevalence were analyzed using logistic regression modelling.

### Results

Of the 4127 subjects, 51.2% were female. 66.2% were married or lived with a partner. The mean age was  $73.4 \pm 6.1$  years. Women were significantly less likely to be married or to live with a partner than men (52.2% vs. 80.8%). Hypertension, eye diseases, and heart diseases were the most common disorders, with prevalences of 57.9%, 38.1%, and 25.8%, respectively (Table 2). The number of disorders ranged from 0 to 10 (Table 3). The median number of conditions was 2 (25<sup>th</sup> percentile: 1; 75<sup>th</sup> percentile: 3). Women did not differ significantly from men, whereas a higher number of conditions was related to older age.

The prevalence of multimorbidity was 58.6% (95% confidence interval: 57.0–60.2) in the total sample. Logistic regression analysis revealed a significant interaction effect of age and sex regarding the occurrence of multimorbidity ( $p = 0.02$ ). While multimorbidity was significantly associated with increasing age, only in the age group  $\geq 85$  years women were significantly more likely than men to have  $\geq 2$  conditions.

Table 4 shows the 12 most common pairs of conditions, their observed and expected frequency and the odds ratios testing their association. Hypertension, eye diseases, diabetes mellitus, and heart diseases were most often associated with a second condition. The occurrence of hypertension in combination with heart disease, diabetes, or stroke, respectively was more likely than expected, as well as the occurrence of eye diseases in combination with diabetes, joint diseases or lung diseases. Heart diseases also occurred more often than expected in combination with diabetes or joint diseases. These results were confirmed after adjustments for age, sex, and all other diseases (Table 4). Hypertension and diabetes, as well as hypertension and stroke emerged as the most strongly associated pairs of diseases.

In the factor analysis, four factors emerged with a total of 47.8 cumulative percent. The Kaiser-Meyer-Olkin measure of 0.72 indicated a moderate sampling adequacy. The first pattern (eigenvalue 1.90) was characterized by high loadings for hypertension, heart diseases, diabetes and stroke and could be named as cardiovascular/metabolic disorders. The second factor (eigenvalue 1.76) was characterized by moderate factor loadings of joint, liver, lung and eye diseases. The third factor (eigenvalue 1.61) could be characterized by high factor loadings of mental diseases and neurologic diseases, and consequently was interpreted as multimorbidity pattern of mental and neurologic disorders. The fourth pattern (eigenvalue 1.54) showed high factor loadings of gastrointestinal diseases and cancer. While some diseases including hypertension, mental disorders and cancer were clearly associated

**Table 3.** Number of conditions stratified by age group and sex.

| No. of conditions | Total sample<br>(n = 4067) | <75 years<br>(n = 2541) |                  | 75–84 years<br>(n = 1315) |                 | ≥85 years<br>(n = 211) |                 |
|-------------------|----------------------------|-------------------------|------------------|---------------------------|-----------------|------------------------|-----------------|
|                   |                            | Men (n = 1225)          | Women (n = 1316) | Men (n = 664)             | Women (n = 651) | Men (n = 93)           | Women (n = 118) |
| 0                 | 507 (12.5%)                | 211 (17.2%)             | 197 (15.0%)      | 57 (8.6%)                 | 33 (5.1%)       | 3 (3.2%)               | 6 (5.1%)        |
| 1                 | 1096 (27.0%)               | 370 (30.2%)             | 416 (31.6%)      | 142 (21.4%)               | 141 (21.7%)     | 19 (20.4%)             | 8 (6.8%)        |
| 2                 | 1093 (26.9%)               | 335 (27.3%)             | 357 (27.1%)      | 161 (24.3%)               | 186 (28.6%)     | 21 (22.6%)             | 33 (28.0%)      |
| 3                 | 713 (17.5%)                | 187 (15.3%)             | 193 (14.7%)      | 149 (22.4%)               | 129 (19.7%)     | 20 (21.5%)             | 35 (29.6%)      |
| 4–6               | 621 (15.3%)                | 116 (9.5%)              | 142 (10.8%)      | 147 (22.1%)               | 156 (24.0%)     | 28 (30.1%)             | 32 (27.1%)      |
| >6                | 37 (0.8%)                  | 6 (0.5%)                | 11 (0.8%)        | 8 (1.2%)                  | 6 (0.9%)        | 2 (2.2%)               | 4 (3.4%)        |
| ≥2                | 2464 (60.6%)               | 581 (47.4%)             | 613 (46.6%)      | 465 (70.0%)               | 477 (73.3%)     | 71 (76.3%)             | 104 (88.1%)     |

doi:10.1371/journal.pone.0030556.t003

with only one factor, six out of the 13 disorders showed factor loadings  $>0.25$  on at least two factors.

Table 5 depicts the frequencies of the four patterns. The cardiovascular/metabolic diseases pattern was the most common one, followed by the joint/liver/lung and eye diseases pattern. The association of the occurrence of the single patterns with age and sex was analyzed using logistic regression modelling. Higher age was significantly related to a higher frequency of joint, liver, lung and eye diseases after adjustments for sex and the interaction between age and sex ( $p = .001$ ; odds ratio (OR) 1.068, 95% confidence interval [1.029–1.108]. Regarding the occurrence of the cardiovascular/metabolic disease pattern, a significant interaction effect between age and sex ( $p = .006$ ) was found with a higher occurrence for males in the younger age groups and a lower in the oldest age group. Regarding the two further patterns, no significant age or sex differences were found.

Among the total sample, 56.0% could not be assigned to any of the four disease patterns. 24.8% of the people could be assigned to one disease pattern, 14.4% to two, 4.2% to three, and 0.7% to all four patterns.

When analyzing pair-wise occurrence of disease pattern, 14% of the people could be assigned to both the cardiovascular/metabolic pattern and the joint/liver/lung/eye pattern. Further common pairs are the mental/neurologic pattern combined with the cardiovascular/metabolic pattern (7.2%) or the joint/liver/lung/eye pattern (5.3%).

## Discussion

In the present study we used different approaches to describe comorbidity and multimorbidity in the elderly German population. Hypertension and diabetes, as well as hypertension and stroke were the two diseases which occurred most commonly in combination. This association was independent of age, sex and the presence of other conditions. Furthermore, we identified four patterns of multimorbidity: the first pattern includes cardiovascular and metabolic diseases, the second includes joint, liver, lung and eye diseases, the third covers mental and neurologic diseases and the fourth pattern includes gastrointestinal diseases and cancer.

**Table 4.** Most frequently co-occurring pairs of conditions and their observed and expected prevalences.

|                                            | Observed | Expected | Ratio observed/expected | Crude OR<br>[99.58% CI] | p-value | Adjusted OR<br>[99.58% CI]* | p-value <sup>#</sup> |
|--------------------------------------------|----------|----------|-------------------------|-------------------------|---------|-----------------------------|----------------------|
| Hypertension and eye diseases              | 23.80    | 22.64    | 1.05                    | 1.21 [1.01–1.46]        | 0.003   | 1.04 [0.84–1.28]            | 0.632                |
| Hypertension and heart diseases            | 18.39    | 15.58    | 1.18                    | 1.86 [1.50–2.30]        | <.001   | 1.67 [1.32–2.11]            | <.001                |
| Hypertension and diabetes                  | 13.68    | 10.11    | 1.35                    | 3.20 [2.41–4.25]        | <.001   | 2.95 [2.19–3.96]            | <.001                |
| Hypertension and joint diseases            | 10.08    | 9.70     | 1.04                    | 1.13 [0.88–1.44]        | 0.160   | 1.00 [0.77–1.30]            | 0.992                |
| Eye diseases and diabetes                  | 8.11     | 6.62     | 1.22                    | 1.53 [1.20–1.94]        | <.001   | 1.36 [1.04–1.77]            | 0.001                |
| Eye and joint diseases                     | 7.57     | 6.35     | 1.19                    | 1.45 [1.14–1.85]        | <.001   | 1.25 [0.96–1.63]            | 0.018                |
| Hypertension and lung diseases             | 6.78     | 6.23     | 1.09                    | 1.28 [0.95–1.73]        | 0.020   | 1.13 [0.82–1.57]            | 0.268                |
| Heart diseases and diabetes                | 6.39     | 4.56     | 1.40                    | 1.84 [1.43–2.36]        | <.001   | 1.46 [1.11–1.92]            | <.001                |
| Eye and lung diseases                      | 5.43     | 4.08     | 1.33                    | 1.81 [1.35–2.42]        | <.001   | 1.65 [1.20–2.28]            | <.001                |
| Hypertension and stroke                    | 5.32     | 4.12     | 1.29                    | 2.39 [1.59–3.59]        | <.001   | 2.00 [1.26–3.16]            | <.001                |
| Heart diseases and joint diseases          | 5.31     | 4.37     | 1.21                    | 1.40 [1.08–1.82]        | 0.002   | 1.24 [0.93–1.64]            | 0.034                |
| Hypertension and gastrointestinal diseases | 5.30     | 4.70     | 1.13                    | 1.07 [0.77–1.47]        | 0.562   | 0.93 [0.66–1.31]            | 0.530                |

Results from logistic regression models testing the association between pairs of conditions.

\*Odds ratios (OR) were adjusted for age, sex and all other diseases.

doi:10.1371/journal.pone.0030556.t004

**Table 5.** Number and percent of persons who could be assigned to the multimorbidity patterns.

|                                       | Total (n = 2846) | Men (n = 1411) | Women (n = 1435) | p-value | <75 years (n = 1439) | 75–84 years (n = 1174) | ≥85 years (n = 233) | p-value |
|---------------------------------------|------------------|----------------|------------------|---------|----------------------|------------------------|---------------------|---------|
| Cardiovascular/metabolic disorders    | 1314 (31.8%)     | 699 (34.7%)    | 615 (29.1%)      | <0.01   | 678 (47.1%)          | 539 (45.9%)            | 97 (41.6%)          | <0.01   |
| Liver/lung/joint/eye disorders        | 1041(25.2%)      | 479 (23.7%)    | 562 (26.7%)      | 0.04    | 490 (34.1%)          | 456 (38.8%)            | 95 (40.8%)          | <0.01   |
| Mental/neurologic disorders           | 398 (9.7%)       | 187 (9.3%)     | 211 (10.0%)      | 0.44    | 219 (15.2%)          | 150 (12.8%)            | 29 (12.4%)          | <0.01   |
| Gastrointestinal disorders and cancer | 93 (2.3%)        | 46 (2.3%)      | 47 (2.2%)        | 0.90    | 52 (3.6%)            | 29 (2.5%)              | 12 (5.2%)           | 0.01    |

Results of Chi<sup>2</sup>-test for sex and age-group differences.  
doi:10.1371/journal.pone.0030556.t005

In general, it is difficult to compare results across different studies, because these remarkably differ regarding data sources, populations, and number and type of diseases [10]. However, the prevalence of multimorbidity of 58.6% in our study fits well with the reported range of multimorbidity rates in elderly populations [3,9,11,13,26]. While the relation of multimorbidity with age is well documented [8,26,27], the reports on differences between the sexes are conflicting. Some studies did not retrieve significant differences between women and men regarding multimorbidity [8,12,27] whereas others found women older than 65 [26] or 77 years [28] to be more likely to be multimorbid than men. In our study, only women aged ≥85 years were more likely than men to report two or more conditions.

The most common comorbid pairs found in our study were hypertension and diabetes, hypertension and stroke, as well as hypertension and heart disease which reflect well-established pathophysiological associations [29–31]. Furthermore, the association between heart disease and diabetes indicated the existence of a cardiovascular/metabolic disorder pattern. Consistent with the pair-wise associations between cardiovascular disorders and diabetes, the factor analysis identified a pattern that covered these conditions and had the highest frequency of 31.8% within the study sample.

Regarding the pair-wise co-occurrence of diseases, we found a significant association between eye diseases and diabetes. It may be explained by the possible microvascular complications of diabetes such as diabetic retinopathy [32], and the occurrence of cataract, which was reported to be more common in persons with diabetes than in non-diabetic persons [33]. Furthermore, rheumatoid arthritis can have a number of extraarticular manifestations related to the heart as well as to the eyes [34]. This fact might have contributed to the significant relation between joint diseases and heart diseases, and joint diseases and eye diseases, respectively, detected in our study. Finally, eye and lung diseases co-occurred significantly more often than expected. This finding contributes to the current controversial discussion about a relation between the systemic inflammation and/or decreased systemic oxygenation associated with lung diseases and the risk of age-related macular degeneration [35,36]. An additional potential explanation for this finding could be the reported increased risk of cataracts associated with long-term use of corticosteroids in the treatment of asthma [37].

In accordance with other studies which examined multimorbidity using cluster or factor analysis, we found a pattern of cardiovascular and related diseases. In two other studies, metabolic diseases [18] or stroke [17] were included in this pattern. We can confirm the results of Schäfer et al. [19] that both conditions, diabetes and stroke, were assigned to the cardiovascular/metabolic pattern.

Moreover, we found a disease pattern that covers mental disorders (depression, anxiety) and neurologic disorders such as

Parkinson's disease, multiple sclerosis or epilepsy. This finding is overall consistent with Cornell et al. [18] who identified a mixed anxiety-depression cluster in their sample. Neurologic disorders like Parkinson's disease, multiple sclerosis or epilepsy were not considered in their study. Our results are consistent with the growing literature on the comorbid relationship and biological association between depression and anxiety [38,39] as well as on the frequent association of depression and anxiety with other neurologic diseases [40,41].

Of interest, we demonstrated in our study that the mental/neurologic pattern frequently overlapped with the cardiovascular/metabolic pattern or the joint/liver/lung/eye pattern. This finding supports the current discussion about inflammatory as well as oxidative and nitrosative stress pathways that underpin the common pathophysiology of depression and disorders such as cardiovascular disease, diabetes, stroke, chronic obstructive pulmonary disease, rheumatoid arthritis, and inflammatory bowel disease, and that activation of these pathways contributes to shared risk [42,43].

Since the mental/neurologic pattern emerged as a relevant factor of multimorbidity in our study, we agree with Maes et al. [42] that mental conditions should be assessed in studies on multimorbidity in the elderly population. It may also be useful to include dementia, which was not done in our study. Unfortunately, neither mental nor neurological conditions are included in the most frequently used comorbidity measure, the Charlson Comorbidity Index [22].

Our study is the second published study which applied factor analysis methodology to explore the structure of multimorbidity in elderly people. Recently, Schäfer et al. [19] have demonstrated the benefit of applying a factor analytical approach which allows diseases to be associated with more than one pattern, in contrast to cluster analysis. They have shown that seven out of 46 diseases included in their analysis were associated with different patterns, for instance depression, stroke and cardiac insufficiency. In our study we could confirm that almost one half of the 13 diseases, including stroke and heart diseases, correlated with more than one pattern, whereas the mental diseases including depression were clearly associated with only one factor. In accordance with Schäfer et al. [19], we detected a limited number of factors that could be well interpreted. The model fit, however, was moderate with a rate of cumulative percent of 48% and a Kaiser-Meyer-Olkin measure of 0.72.

The number and selection of diseases considered in our study and the self-report methodology used, surely will have affected our results. Although our assessment of diseases was generally based on the Charlson Comorbidity Index [22], we have added some disorders which seemed highly relevant for exploring multimorbidity in the elderly population, such as hypertension, eye diseases, mental diseases and neurologic diseases. On the one

hand, this approach has reduced standardization and comparability with other studies. On the other hand, these additional disorders emerged as the most important ones in the analysis and thus contributed to the validity of the study. Furthermore, we used standard multi-item scales for the assessment of depression and anxiety as compared to simply ask patients for the presence of these problems. This might also have influenced our results. In addition, we have only assessed the occurrence of a disease without taking into account the severity. Finally, our study had a cross-sectional design and therefore allows no conclusions regarding causal relationships among disease clusters.

Underlying these limitations is the lack of an internationally accepted standard for assessing multimorbidity. A conceptual framework including a consistent measurement approach of multimorbidity for different study populations would strongly facilitate comparisons between studies and populations [27].

## References

- Van den Akker M, Buntinx F, Knottnerus JA (1996) Comorbidity or multimorbidity: What's in a name? A review of literature. *Eur J Gen Pract* 2: 65–70.
- Loza E, Jover JA, Rodriguez L, Carmona L, EPISER Study Group (2009) Multimorbidity: prevalence, effect on quality of life and daily functioning, and variation of this effect when one condition is a rheumatic disease. *Semin Arthritis Rheum* 38: 312–319.
- Fortin M, Dubois MF, Hudon C, Soubhi H, Almirall J (2007) Multimorbidity and quality of life: a closer look. *Health Qual Life Outcomes* 5: 52.
- Crentsil V, Ricks MO, Xue QL, Fried LP (2010) A pharmacoepidemiologic study of community-dwelling, disabled older women: Factors associated with medication use. *Am J Geriatr Pharmacother* 8: 215–224.
- Laux G, Kuehlein T, Rosemann T, Szecsenyi J (2008) Co- and multimorbidity patterns in primary care based on episodes of care: results from the German CONTENT project. *BMC Health Serv Res* 8: 14.
- Fung CH, Setodji CM, Kung FY, Keesey J, Asch SM, et al. (2008) The relationship between multimorbidity and patients' ratings of communication. *J Gen Intern Med* 23: 788–793.
- Schoenberg NE, Kim H, Edwards W, Fleming ST (2007) Burden of common multiple-morbidity constellations on out-of-pocket medical expenditures among older adults. *Gerontologist* 47: 423–437.
- Taylor AW, Price K, Gill TK, Adams R, Pilkington R, et al. (2010) Multimorbidity - not just an older person's issue. Results from an Australian biomedical study. *BMC Public Health* 10: 718.
- Van den Akker M, Buntinx F, Metsemakers JF, Roos S, Knottnerus JA (1998) Multimorbidity in general practice: prevalence, incidence, and determinants of co-occurring chronic and recurrent diseases. *J Clin Epidemiol* 51: 367–75.
- Fortin M, Hudon C, Haggerty J, Akker M, Almirall J (2010) Prevalence estimates of multimorbidity: a comparative study of two sources. *BMC Health Serv Res* 10: 111.
- Nagel G, Peter R, Braig S, Hermann S, Rohrmann S, et al. (2008) The impact of education on risk factors and the occurrence of multimorbidity in the EPIC-Heidelberg cohort. *BMC Public Health* 8: 384.
- Van den Bussche H, Koller D, Kolonko T, Hansen H, Wegscheider K, et al. (2011) Which chronic diseases and disease combinations are specific to multimorbidity in the elderly? Results of a claims data based cross-sectional study in Germany. *BMC Public Health* 11: 101.
- Marengoni A, Angleman S, Melis R, Mangialasche F, Karp A, et al. (2011) Aging with multimorbidity: A systematic review of the literature. *Ageing Res Rev* 2011 10: 430–9.
- Fried LP, Bandeen-Roche K, Kasper JD, Guralnik JM (1999) Association of comorbidity with disability in older women: the Women's Health and Aging Study. *J Clin Epidemiol* 52: 27–37.
- Verbrugge LM, Lepkowski JM, Imanaka Y (1989) Comorbidity and its impact on disability. *Milbank Q* 67: 450–484.
- Marengoni A, Rizzuto D, Wang HX, Winblad B, Fratiglioni L (2009) Patterns of chronic multimorbidity in the elderly population. *J Am Geriatr Soc* 57: 225–230.
- John R, Kerby DS, Hennessy CH (2003) Patterns and impact of comorbidity and multimorbidity among community-resident American Indian elders. *Gerontologist* 43: 649–660.
- Cornell JE, Pugh JA, Williams JW, Kazis L, Parchman ML, et al. (2007) Multimorbidity clusters: Clustering binary data from a large administrative medical database. *Applied Multivariate Research* 12: 163–182.
- Schäfer I, von Leitner EC, Schön G, Koller D, Hansen H, et al. (2010) Multimorbidity patterns in the elderly: a new approach of disease clustering identifies complex interrelations between chronic conditions. *PLoS One* 5: e15941.
- Holle R, Happich M, Löwel H, Wichmann HE, MONICA/KORA Study Group (2005) KORA—a research platform for population based health research. *Gesundheitswesen* 67 Suppl 1: S19–25.
- Löwel H, Döring A, Schneider A, Heier M, Thorand B, et al. (2005) The MONICA Augsburg surveys—basis for prospective cohort studies. *Gesundheitswesen* 67 Suppl 1: S13–18.
- Chaudhry S, Jin L, Meltzer D (2005) Use of a self-report-generated Charlson Comorbidity Index for predicting mortality. *Med Care* 43: 607–615.
- Sheikh JI, Yesavage JA (1985) A knowledge assessment test for geriatric psychiatry. *Hosp Community Psychiatry* 36: 1160–1166.
- Spitzer RL, Kroenke K, Williams JB, Löwe B (2006) A brief measure for assessing generalized anxiety disorder: the GAD-7. *Arch Intern Med* 166: 1092–1097.
- Kubinger KD (2003) On artificial results due to using factor analysis for dichotomous variables. *Psychology Science* 45: 106–110.
- Wolff JL, Starfield B, Anderson G (2002) Prevalence, expenditures, and complications of multiple chronic conditions in the elderly. *Arch Intern Med* 162: 2269–2276.
- Britt HC, Harrison CM, Miller GC, Knox SA (2008) Prevalence and patterns of multimorbidity in Australia. *Med J Aust* 189: 72–77.
- Marengoni A, Winblad B, Karp A, Fratiglioni L (2008) Prevalence of chronic diseases and multimorbidity among the elderly population in Sweden. *Am J Public Health* 98: 1198–1200.
- Meisinger C, Döring A, Heier M (2008) Blood pressure and risk of type 2 diabetes mellitus in men and women from the general population: the Monitoring Trends and Determinants on Cardiovascular Diseases/Cooperative Health Research in the Region of Augsburg Cohort Study. *J Hypertens* 26: 1809–1815.
- Cates MJ, Paton JF, Smeeton NC, Wolfe CD (2011) Hypertension Before and After Posterior Circulation Infarction: Analysis of Data from the South London Stroke Register. *J Stroke Cerebrovasc [Epub ahead of print]*.
- Long AN, Dagogo-Jack S (2011) Comorbidities of diabetes and hypertension: mechanisms and approach to target organ protection. *J Clin Hypertens (Greenwich)* 13: 244–251.
- Prasad S, Kamath GG, Jones K, Clearkin LG, Phillips RP (2001) Prevalence of blindness and visual impairment in a population of people with diabetes. *Eye* 15: 640–643.
- Grauslund J (2011) Eye complications and markers of morbidity and mortality in long-term type 1 diabetes. *Acta Ophthalmol* 89: 1–19.
- Turesson C, McClelland RL, Christianson T, Matteson E (2008) Clustering of extraarticular manifestations in patients with rheumatoid arthritis. *J Rheumatol* 35: 179–180.
- Klein R, Knudtson MD, Klein BEK (2008) Pulmonary disease and age-related macular degeneration. *Arch Ophthalmol* 126: 840–846.
- Moorthy S, Cheung N, Klein R, Shahar E, Wong TY (2011) Are lung disease and function related to age-related macular degeneration? *Am J Ophthalmol* 151: 375–379.
- Weatherall M, Clay J, James K, Perrin K, Shirtcliffe P, et al. (2009) Dose-response relationship of inhaled corticosteroids and cataracts: a systematic review and meta-analysis. *Respirology* 14: 983–990.
- Lamers F, van Oppen P, Comijs HC, Smit JH, Spinhoven P, et al. (2011) Comorbidity patterns of anxiety and depressive disorders in a large cohort study: the Netherlands Study of Depression and Anxiety (NESDA). *J Clin Psychiatry*, [Epub ahead of print].
- Schoevers RA, Beckman AT, Deeg DJ, Jonker C, van Tilburg W (2003) Comorbidity and risk-patterns of depression, generalised anxiety disorder and mixed anxiety-depression in later life: results from the AMSTEL study. *Int J Geriatr Psychiatry* 18: 994–1001.
- Schneider F, Althaus A, Backes V, Dodel R (2008) Psychiatric symptoms in Parkinson's disease. *Eur Arch Psychiatry Clin Neurosci* 258 Suppl 5: 55–59.
- Ottman R, Lipton RB, Ettinger AB, Cramer JA, Reed ML, et al. (2011) Comorbidities of epilepsy: results from the Epilepsy Comorbidities and Health (EPIC) survey. *Epilepsia* 52: 308–315.

42. Maes M, Ruckoanich P, Chang YS, Mahanonda N, Berk M (2010) Multiple aberrations in shared inflammatory and oxidative & nitrosative stress (IO&NS) pathways explain the co-association of depression and cardiovascular disorder (CVD), and the increased risk for CVD and due mortality in depressed patients. *Prog Neuropsychopharmacol Biol Psychiatry* [Epub ahead of print].
43. Maes M, Kubera M, Obuchowiczwa E, Goehler L, Brzeszcz J (2011) Depression's multiple comorbidities explained by (neuro)inflammatory and oxidative & nitrosative stress pathways. *Neuro Endocrinol Lett* 32: 7–24.
